# Supplementary material
Source: PubMed Central journal article supplement (PMC6087494)
Supplement: NIHMS978308-supplement-13361_2018_2002_MOESM1_ESM.pdf [file NIHMS978308-supplement-13361_2018_2002_MOESM1_ESM.pdf]

## SUPPLEMENTAL MATERIALS

### **Native Top-Down Mass Spectrometry and Ion Mobility MS for Characterizing the Cobalt and Manganese Metal Binding of $\alpha$ -Synuclein Protein**

Piriya Wongkongkathep<sup>1,#</sup>, Jong Yoon Han<sup>2</sup>, Tae Su Choi<sup>2</sup>, Sheng Yin<sup>1</sup>, Hugh I. Kim<sup>2</sup>, and  
Joseph A. Loo<sup>1,3\*</sup>

<sup>1</sup>Department of Chemistry and Biochemistry, University of California-Los Angeles, Los Angeles,  
CA, 90095-1569, USA

<sup>2</sup>Department of Chemistry, Korea University, Seoul, Republic of Korea

<sup>3</sup>Department of Biological Chemistry, David Geffen School of Medicine at UCLA, UCLA  
Molecular Biology Institute, and UCLA/DOE Institute for Genomics and Proteomics, University  
of California-Los Angeles, Los Angeles, CA, 90095-1569, USA

*Journal of the American Society for Mass Spectrometry*

<sup>#</sup>*Current address:* Faculty of Medicine, Chulalongkorn University, Bangkok, Thailand

<sup>\*</sup>*Correspondence to:* Joseph A. Loo; *e-mail:* JLoo@chem.ucla.edu

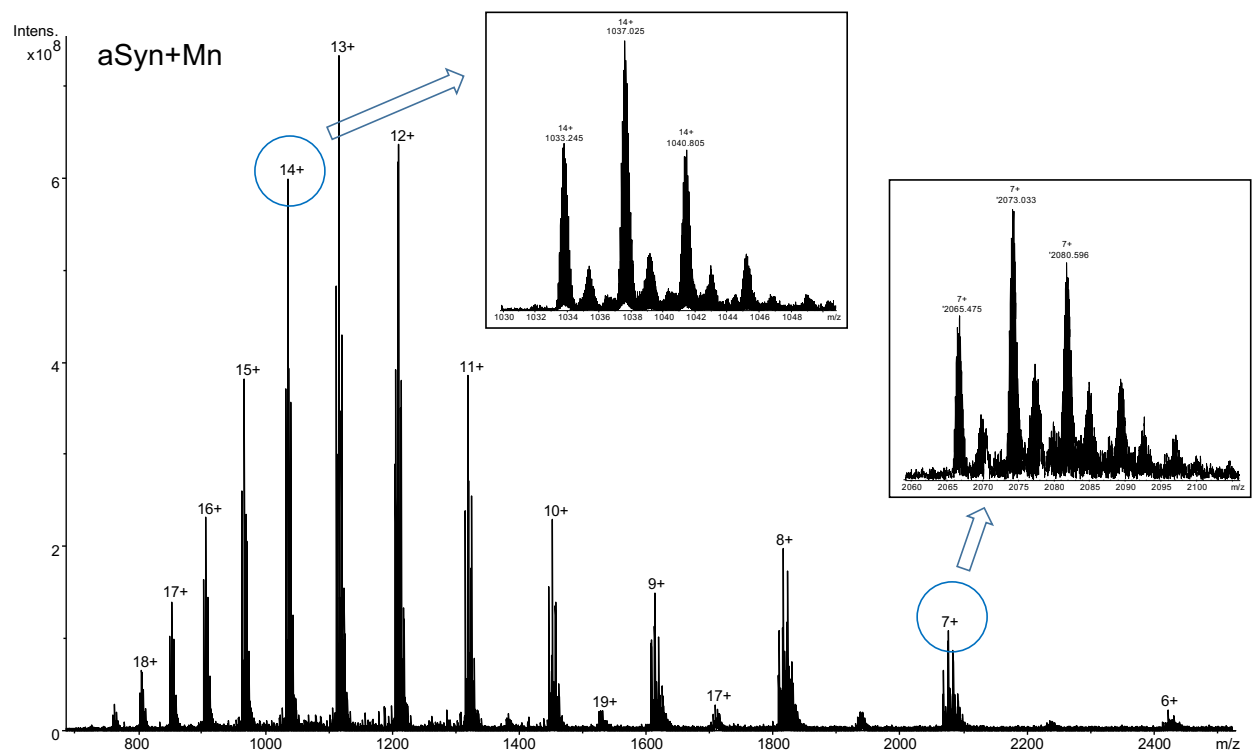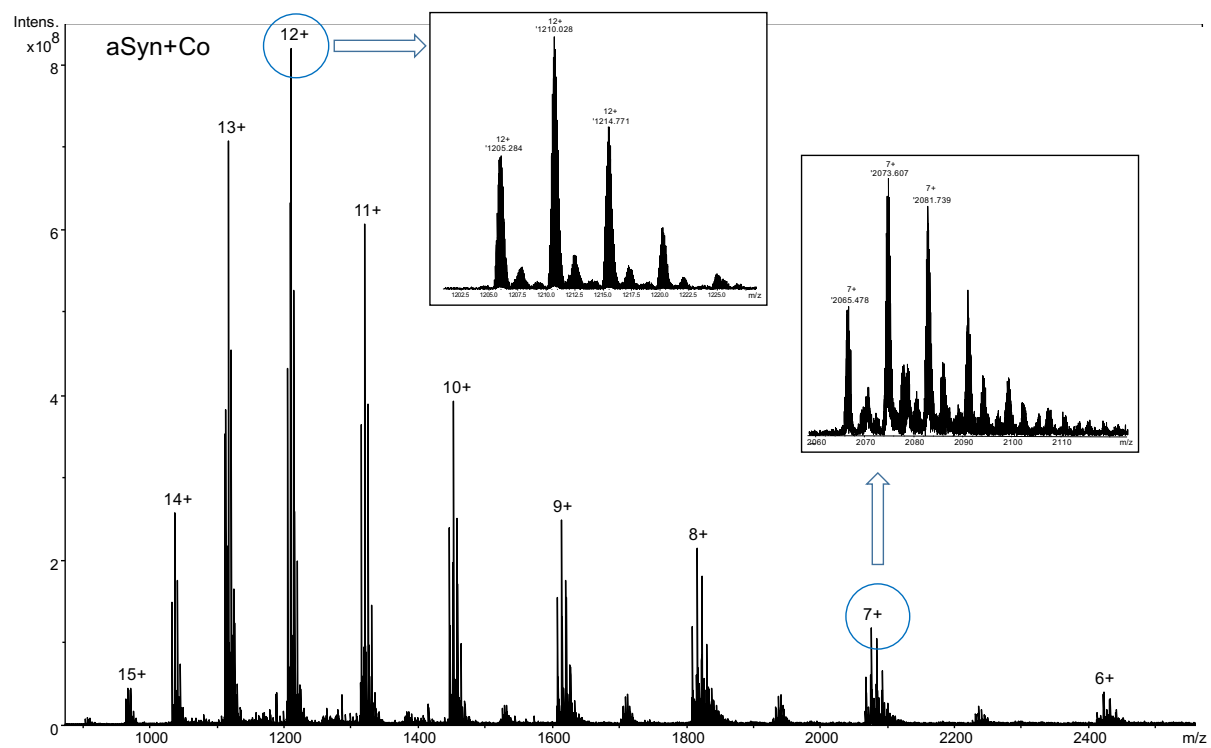

**Figure S1.** Native ESI-MS of  $\alpha$ Syn with (top) Mn- and (bottom) Co-binding. The ratio of metal-bound and apo-proteins are consistent throughout the charge state envelopes.

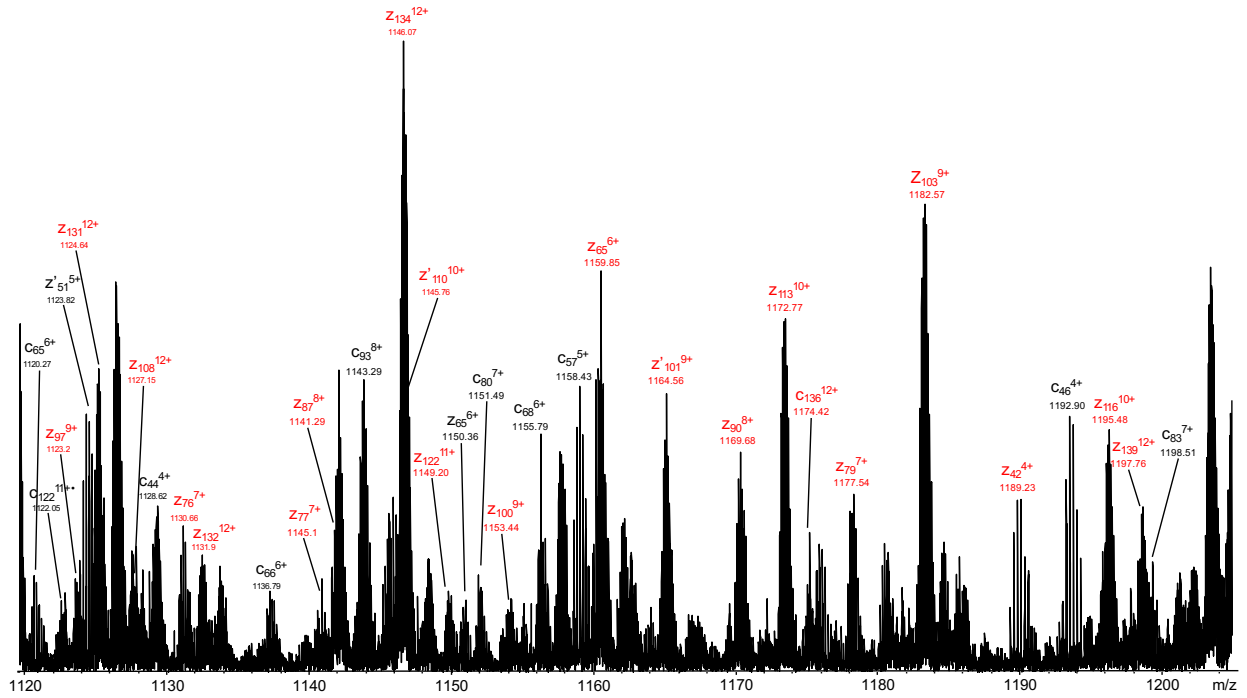

**Figure S2.** Magnified view of ECD spectrum of 14+-charged cobalt-bound  $\alpha$ Syn. Cobalt-bound product ions are labeled in red.

**Table S1.** Measured masses of  $\alpha$ Syn and  $\alpha$ Syn-Co complex

| <b>Cobalt</b>       |                                                         |                                        |            |                                                            |                                           |            |
|---------------------|---------------------------------------------------------|----------------------------------------|------------|------------------------------------------------------------|-------------------------------------------|------------|
| <b>Charge state</b> | <b>Observed <math>\alpha</math>Syn <math>m/z</math></b> | <b>Calculated <math>[M+H]^+</math></b> | <b>ppm</b> | <b>Observed <math>\alpha</math>Syn+Co <math>m/z</math></b> | <b>Calculated <math>[M+Co-H]^+</math></b> | <b>ppm</b> |
| 15+                 | 964.4293                                                | 14452.3370                             | 7.66       | 968.2233                                                   | 14509.2477                                | 7.08       |
| 14+                 | 1033.2447                                               | 14452.3309                             | 7.24       | 1037.3103                                                  | 14509.2494                                | 7.20       |
| 13+                 | 1112.6474                                               | 14452.3288                             | 7.10       | 1117.0256                                                  | 14509.2457                                | 6.94       |
| 12+                 | 1205.2842                                               | 14452.3301                             | 7.18       | 1210.0278                                                  | 14509.2529                                | 7.44       |
| 11+                 | 1314.7639                                               | 14452.3297                             | 7.15       | 1319.9381                                                  | 14509.2462                                | 6.98       |
| 10+                 | 1446.1388                                               | 14452.3221                             | 6.63       | 1451.8307                                                  | 14509.2414                                | 6.65       |
| 9+                  | 1606.7086                                               | 14452.3190                             | 6.41       | 1613.0328                                                  | 14509.2370                                | 6.35       |
| 8+                  | 1807.4187                                               | 14452.2983                             | 4.98       | 1814.5339                                                  | 14509.2205                                | 5.21       |
| 7+                  | 2065.4776                                               | 14452.2999                             | 5.09       | 2073.6074                                                  | 14509.2083                                | 4.36       |

**Table S2.** Measured masses of  $\alpha$ Syn and  $\alpha$ Syn-Mn complex

| <b>Manganese</b>    |                                                         |                                        |            |                                                            |                                           |            |
|---------------------|---------------------------------------------------------|----------------------------------------|------------|------------------------------------------------------------|-------------------------------------------|------------|
| <b>Charge state</b> | <b>Observed <math>\alpha</math>Syn <math>m/z</math></b> | <b>Calculated <math>[M+H]^+</math></b> | <b>ppm</b> | <b>Observed <math>\alpha</math>Syn+Mn <math>m/z</math></b> | <b>Calculated <math>[M+Mn-H]^+</math></b> | <b>ppm</b> |
| 15+                 | 964.4292                                                | 14452.3359                             | 7.59       | 967.9575                                                   | 14505.2606                                | 7.64       |
| 14+                 | 1033.2448                                               | 14452.3320                             | 7.31       | 1037.0250                                                  | 14505.2558                                | 7.31       |
| 13+                 | 1112.6476                                               | 14452.3320                             | 7.31       | 1116.7184                                                  | 14505.2517                                | 7.03       |
| 12+                 | 1205.2837                                               | 14452.3241                             | 6.77       | 1209.6947                                                  | 14505.2560                                | 7.32       |
| 11+                 | 1314.7640                                               | 14452.3308                             | 7.23       | 1319.5744                                                  | 14505.2458                                | 6.62       |
| 10+                 | 1446.1381                                               | 14452.3157                             | 6.18       | 1451.4309                                                  | 14505.2435                                | 6.46       |
| 9+                  | 1606.7064                                               | 14452.2990                             | 5.03       | 1612.5868                                                  | 14505.2230                                | 5.05       |
| 8+                  | 1807.4173                                               | 14452.2874                             | 4.22       | 1814.0337                                                  | 14505.2190                                | 4.77       |
| 7+                  | 2065.4750                                               | 14452.2813                             | 3.81       | 2073.0332                                                  | 14505.1885                                | 2.67       |
